# Supplementary material for: Providing Scale to a Known Taxonomic Unknown—At Least a 70-Fold Increase in Species Diversity in a Cosmopolitan Nominal Taxon of Lichen-Forming Fungi
Source: MDPI journal article supplement (doi:10.3390/jof8050490), 2022-05-08

# Max likelihood partition

Species 1 (support = 0.315) = ASAP 'polytrop41'

---

polytrop41\_\_111\_LLJ20\_28; polytrop41\_\_P266\_19\_66369;  
polytrop41\_\_P168\_19\_66369; polytrop41\_\_107\_LLJ20\_22

Species 2 (support = 1.000) = ASAP 'chlorophaeodes2'

---

chlorophaeodes2\_\_AF159927

Species 3 (support = 0.350) = ASAP 'polytrop61'

---

polytrop61\_\_P240\_ZYY\_39; polytrop61\_\_sl21298; polytrop61\_\_P166\_19\_66372;  
polytrop61\_\_266\_20\_66578; polytrop61\_\_P239\_ZYY\_38

Species 4 (support = 0.093) = ASAP 'somervellii'

---

somervellii\_\_16\_52913; somervellii\_\_18\_60881; somervellii\_\_P286\_20\_69190;  
somervellii\_\_18\_61201; somervellii\_\_16\_53092; somervellii\_\_16\_54770;  
somervellii\_\_16\_52899; somervellii\_\_16\_53086; somervellii\_\_1\_9\_19\_65622;  
somervellii\_\_16\_53579; somervellii\_\_16\_54069; somervellii\_\_16\_53507

Species 5 (support = 0.323) = ASAP 'polytrop22'

---

polytrop22\_\_MK970662; polytrop22\_\_JX036076; polytrop22\_\_JX036037

Species 6 (support = 0.848) = ASAP 'polytrop16'

---

polytrop16\_\_tm14551; polytrop16\_\_tm22539

Species 7 (support = 0.062) = ASAP 'polytrop42' & 'polytrop43'

---

polytrop42\_\_6842; polytrop42\_\_KU934869; polytrop43\_\_79\_16\_52934;  
polytrop43\_\_S79\_16\_52934

Species 8 (support = 0.477) = ASAP 'polytrop40'

---

polytrop40\_\_sl18598q; polytrop40\_\_sl18598v1GENOME; polytrop40\_\_sl18598z;  
polytrop40\_\_sl18598v1; polytrop40\_\_262\_20\_66573

Species 9 (support = 0.302) = ASAP 'concolor1' & 'concolor2'

---

concolor1\_\_AF070037; concolor2\_\_HQ650678

Species 10 (support = 1.000) = ASAP 'polytrop63'

---

polytrop63\_\_tm17695

Species 11 (support = 1.000) = ASAP 'polytrop62'

---

polytrop62\_\_DQ534470

Species 12 (support = 0.501) = ASAP 'chlorophaeodes1'

---

chlorophaeodes1\_\_AF070029; chlorophaeodes1\_\_AY398704

Species 13 (support = 1.000) = ASAP 'polytrop64'

---

polytrop64\_\_142\_20\_67286

Species 14 (support = 1.000) = ASAP 'intricata03'

---

intricata\_Flalus\_29565b

Species 15 (support = 0.104) = ASAP 'intricata01' & 'intricata02'

---

intricata01\_\_P222\_ZYY\_135; intricata01\_\_tm13834a; intricata01\_\_tm17204b;  
intricata01\_\_AF070022; intricata01\_\_AY398703; intricata01\_\_KY266975;  
intricata02\_\_S272\_15\_49218; intricata02\_\_tm3614b; intricata02\_\_KY266891

Species 16 (support = 1.000) = ASAP 'polytrop65'

---

polytrop65\_\_P223\_ZYY\_134

Species 17 (support = 0.713) = ASAP 'polytrop25'

---

polytrop25\_\_117\_LLJ20\_37; polytrop25\_\_P229\_ZYY\_115

Species 18 (support = 0.722) = ASAP 'polytrop50'

---

polytrop50\_\_199\_20\_67021; polytrop50\_\_271\_20\_66614

Species 19 (support = 0.063) = ASAP 'solarisA' & 'solarisB'

---

solarisA\_\_MH512981; solarisA\_\_MW257120; solarisA\_\_MW257119;  
solarisA\_\_MW257121; solarisA\_\_MH512983; solarisA\_\_MH512984;  
solarisA\_\_MH512982; solarisB\_\_P270\_19\_64914

Species 20 (support = 0.007) = ASAP 'polytrop01' & 'polytrop02'

---

polytrop02\_\_KP314321; polytrop02\_\_KP314323; polytrop02\_\_KP314338;  
polytrop02\_\_KP314376; polytrop02\_\_KP314461; polytrop02\_\_KP314322;  
polytrop02\_\_tm17811; polytrop02\_\_LICHN603\_20; polytrop02\_\_tm17629;  
polytrop02\_\_tm10003202; polytrop01\_\_sl21283; intricata\_Flalus\_29519;  
polytrop01\_\_sl21286; intricata\_RodriguezFlalus\_3751

Species 21 (support = 1.000) = ASAP 'polytrop03'

---

polytrop03\_\_JN873881

Species 22 (support = 1.000) = ASAP 'polytrop05'

---

polytrop05\_\_11\_20\_67481

Species 23 (support = 0.001) = ASAP 'fuscobrunnea', 'polytrop04' & 'polytrop25'

---

fuscobrunnea\_\_JN873875; fuscobrunnea\_\_MK208774; fuscobrunnea\_\_MK208720;  
fuscobrunnea\_\_MK208760; fuscobrunnea\_\_MK208809; fuscobrunnea\_\_MK208803;  
fuscobrunnea\_\_JN873877; fuscobrunnea\_\_MK208784; fuscobrunnea\_\_MK208807;  
fuscobrunnea\_\_MK208817; fuscobrunnea\_\_MK208773; fuscobrunnea\_\_MK208752;  
fuscobrunnea\_\_MK208799; fuscobrunnea\_\_MK208732; fuscobrunnea\_\_MK208810;  
fuscobrunnea\_\_MK208804; fuscobrunnea\_\_JN873873; fuscobrunnea\_\_JN873874;  
fuscobrunnea\_\_MK208806; fuscobrunnea\_\_JN873876; fuscobrunnea\_\_GU170839;  
fuscobrunnea\_\_GU170840; fuscobrunnea\_\_DQ534484; fuscobrunnea\_\_MK970660;  
fuscobrunnea\_\_MK208710; fuscobrunnea\_\_MK208816; fuscobrunnea\_\_MK208726;  
fuscobrunnea\_\_MK208714; fuscobrunnea\_\_JN873872; fuscobrunnea\_\_MK208724;  
fuscobrunnea\_\_MK208765; fuscobrunnea\_\_MK970661; fuscobrunnea\_\_JX036118;  
fuscobrunnea\_\_sl20115GENOME; polytrop01\_\_sl20101GENOME;

fuscobrunnea\_\_HQ650643; polytropa01\_\_sl20098GENOME;  
polytropa04\_\_71\_20\_67247; polytropa04\_\_204\_20\_67090

Species 24 (support = 0.081) = ASAP 'subintricata1' & 'subintricata5'

---

subintricata1\_\_MT938943; subintricata1\_\_MT938938; subintricata1\_\_MT938939;  
subintricata1\_\_MT938951; subintricata1\_\_MT938935; subintricata1\_\_MT938952;  
subintricata1\_\_MT938923; subintricata1\_\_MT938969; subintricata1\_\_MT938985;  
subintricata1\_\_MT938934; subintricata1\_\_MT938928; subintricata1\_\_MT938940;  
subintricata1\_\_MT938986; subintricata1\_\_GU480112; subintricata1\_\_MT938946;  
subintricata5\_\_MT939010

Species 25 (support = 1.000) = ASAP 'subintricata4'

---

subintricata4\_\_MT939009

Species 26 (support = 0.039) = ASAP 'polytropa51'

---

polytropa51\_\_215\_20\_66971; polytropa51\_\_227\_20\_66787;  
polytropa51\_\_15\_20\_69102; polytropa51\_\_246\_20\_67710;  
polytropa51\_\_298\_20\_66724; polytropa51\_\_P250\_19\_64312;  
polytropa51\_\_3\_20\_67471; polytropa51\_\_32\_20\_67444; polytropa51\_\_251\_20\_67583;  
polytropa51\_\_254\_20\_67584; polytropa51\_\_14\_20\_69106;  
polytropa51\_\_41\_20\_69021; polytropa51\_\_S72\_16\_50647; polytropa51\_\_5\_20\_67464;  
polytropa51\_\_72\_16\_50647; polytropa51\_\_17\_20\_69097; polytropa51\_\_33\_20\_67446

Species 27 (support = 0.891) = ASAP 'polytropa53'

---

polytropa53\_\_1\_69\_19\_65636; polytropa53\_\_P216\_19\_65636;  
polytropa53\_\_1\_3\_19\_63691; polytropa53\_\_P185\_19\_65279

Species 28 (support = 1.000) = ASAP 'polytropa52'

---

polytropa52\_\_G28\_16\_54064

Species 29 (support = 0.505) = ASAP 'polytropa54'

---

polytropa54\_\_sl18541z; polytropa54\_\_sl18541zGENOME

Species 30 (support = 0.999) = ASAP 'polytropa55'

---

polytropa55\_\_118\_LLJ20\_38

Species 31 (support = 0.996) = ASAP 'polytropa66'

---

polytropa66\_\_268\_20\_66611

Species 32 (support = 0.996) = ASAP 'polytropa67'

---

polytropa67\_\_267\_20\_66584

Species 33 (support = 0.998) = ASAP 'intricata08'

---

intricata\_RodriguezFlakus\_3757

Species 34 (support = 0.998) = ASAP 'polytropa06'

---

polytropa06\_\_P230\_ZYY\_103

Species 35 (support = 1.000) = ASAP 'polytropo60'

---

polytropo60\_\_P267\_19\_66369a

Species 36 (support = 0.282) = ASAP 'polytropo44'

---

polytropo44\_\_6834; polytropo44\_\_6875; polytropo44\_\_6868; polytropo44\_\_6867

Species 37 (support = 0.544) = ASAP 'polytropo45'

---

polytropo45\_\_245\_20\_67689; polytropo45\_\_297\_20\_66712;  
polytropo45\_\_248\_20\_67696

Species 38 (support = 0.987) = ASAP 'polytropo48'

---

polytropo48\_\_94\_LLJ20\_3

Species 39 (support = 0.987) = ASAP 'polytropo47'

---

polytropo47\_\_125\_LLJ20\_51

Species 40 (support = 1.000) = ASAP 'polytropo49'

---

polytropo49\_\_122\_LLJ20\_47

Species 41 (support = 0.339) = ASAP 'polytropo31'

---

polytropo31\_\_sl18522a; polytropo31\_\_sl18522b; polytropo31\_\_sl18522aGENOME

Species 42 (support = 1.000) = ASAP 'polytropo35'

---

polytropo35\_\_93\_LLJ20\_2

Species 43 (support = 1.000) = ASAP 'polytropo39'

---

polytropo39\_\_121\_LLJ20\_46

Species 44 (support = 0.341) = ASAP 'polytropo38'

---

polytropo38\_\_L0012a; polytropo38\_\_sl16512aGENOME; polytropo38\_\_L0012c;  
polytropo38\_\_sl16512bGENOME; polytropo38\_\_L0012b; polytropo38\_\_sl21285;  
polytropo38\_\_sl20113; polytropo38\_\_sl18474aGENOME; polytropo38\_\_sl18474a

Species 45 (support = 0.447) = ASAP 'polytropo59'

---

polytropo59\_\_P167\_19\_66369b; polytropo59\_\_P268\_19\_66369b;  
polytropo59\_\_P242\_ZYY\_34; polytropo59\_\_P241\_ZYY\_35

Species 46 (support = 0.989) = ASAP 'polytropo57'

---

polytropo57\_\_114\_LLJ20\_33

Species 47 (support = 0.398) = ASAP 'polytropo23'

---

polytropo23\_\_tm13834b; polytropo23\_\_tm17204a

Species 48 (support = 0.812) = ASAP 'polytropo24' (part 1)

---

polytropo24\_\_KP314458

Species 49 (support = 0.848) = ASAP 'polytropo24' (part 2)

---

polytropo24\_\_sl18259b

Species 50 (support = 0.880) = ASAP 'polytrop24' (part 3)

---

polytrop24\_\_126\_LLJ20\_52

Species 51 (support = 0.565) = ASAP 'dispersoareolata'

---

dispersoareolata\_\_92\_LLJ20\_1; dispersoareolata\_\_AF070016

Species 52 (support = 0.979) = ASAP 'polytrop46'

---

polytrop46\_\_P237\_ZYY\_52

Species 53 (support = 0.016) = ASAP 'polytrop07'

---

polytrop07\_\_sl18259GENOME; polytrop07\_\_sl21297; polytrop07\_\_sl21296;  
polytrop07\_\_sl18404b; polytrop07\_\_sl18402; polytrop07\_\_sl18402GENOME;  
polytrop07\_\_sl18304bGENOME; polytrop07\_\_sl18304b; polytrop07\_\_sl21322;  
polytrop07\_\_sl21321; polytrop07\_\_sl18259bGENOME; polytrop07\_\_sl21282a;  
sl21282; polytrop07\_\_sl21282b; polytrop07\_\_sl18370aGENOME;  
polytrop07\_\_sl18370a; polytrop07\_\_sl18346d; polytrop07\_\_sl20114;  
polytrop07\_\_sl21295; polytrop07\_\_sl18346dGENOME; polytrop07\_\_sl18356poly;  
polytrop07\_\_sl18358GENOME; polytrop07\_\_sl18358a

Species 54 (support = 0.997) = ASAP 'polytrop08'

---

polytrop08\_\_AF070017

Species 55 (support = 0.494) = ASAP 'polytrop09'

---

polytrop09\_\_tm22536; polytrop09\_\_tm2379

Species 56 (support = 0.736) = ASAP 'polytrop27'

---

polytrop27\_\_sl18455b; polytrop27\_\_sl18455bGENOME; polytrop27\_\_sl21280

Species 57 (support = 0.414) = ASAP 'polytrop26'

---

polytrop26\_\_sl18665poly; polytrop26\_\_sl18669; polytrop26\_\_sl18669GENOME

Species 58 (support = 0.114) = ASAP 'polytrop28' & 'polytrop29'

---

polytrop28\_\_KP314319; polytrop28\_\_tm21121; polytrop28\_\_LICHN301\_19;  
polytrop29\_\_KP314294; polytrop29\_\_KP314299

Species 59 (support = 0.991) = ASAP 'polytrop30'

---

polytrop30\_\_sl21294

Species 60 (support = 1.000) = ASAP 'polytrop21'

---

polytrop21\_\_116\_LLJ20\_35

Species 61 (support = 0.000) = ASAP 'polytrop10', 'polytrop11', 'polytrop12', 'polytrop13',  
'polytrop14', 'polytrop15' & 'polytrop48'

---

polytrop10b\_\_sl18251a; polytrop10b\_\_sl18282b; polytrop10b\_\_sl18256GENOME;  
polytrop10b\_\_sl18273b; polytrop10b\_\_sl18282polyGENOME;  
polytrop10b\_\_sl18376b; polytrop10b\_\_sl18273poly; polytrop10b\_\_sl18405c;  
polytrop10b\_\_sl18282bGENOME; polytrop10b\_\_sl18583poly;

polytropa10b\_\_sl18251aGENOME; polytropa10a\_\_252\_20\_67583;  
polytropa10a\_\_255\_20\_67573; polytropa10b\_\_sl21299; polytropa10b\_\_sl21301;  
polytropa10b\_\_sl18455c; polytropa10b\_\_sl18455cGENOME; polytropa10b\_\_sl18256;  
polytropa10b\_\_sl18521poly; polytropa10b\_\_sl18355poly; sl21135leca;  
polytropa10b\_\_sl18280c; sl21370a\_polytropa; polytropa10b\_\_sl21281;  
polytropa10b\_\_sl21320; polytropa10b\_\_sl21302; polytropa10b\_\_jh22700;  
polytropa10b\_\_LICHN777\_20; polytropa10b\_\_tm20502; polytropa10b\_\_sl18375b;  
polytropa10b\_\_sl18375bGENOME; sl21367\_polytropaAGG1;  
polytropa11\_\_272\_20\_66615; polytropa11\_\_sl21284; sl21337\_polytropa;  
sl21387\_polytropa; sl21391\_polytropa; sl21353\_polytropa; polytropa14\_\_sl20104;  
polytropa14\_\_sl20104GENOME; polytropa13\_\_L0039; polytropa13\_\_sl16539GENOME;  
polytropa13\_\_sl20112GENOME; polytropa13\_\_L0050; polytropa13\_\_sl16550GENOME;  
polytropa12a\_\_264\_20\_66574; polytropa12a\_\_KP314358;  
polytropa12a\_\_265\_20\_66576; polytropa12a\_\_sl17714;  
polytropa12a\_\_sl17714GENOME; polytropa12b\_\_sl21287a;  
polytropa12a\_\_P228\_ZYY\_121; polytropa15\_\_sl20102; polytropa15\_\_sl20103;  
polytropa15\_\_sl20102GENOME; polytropa15\_\_sl18595;  
polytropa15\_\_sl18595GENOME

Species 62 (support = 1.000) = ASAP 'polytropa20'

---

polytropa20\_\_95\_LLJ20\_7

Species 63 (support = 0.056) = ASAP 'polytropa17' & 'polytropa18'

---

polytropa17\_\_137\_20\_67152; polytropa17\_\_174\_20\_68348;  
polytropa17\_\_202\_20\_68015; polytropa17\_\_20\_67942\_185;  
polytropa17\_\_20\_67921\_179; polytropa17\_\_242\_20\_67765;  
polytropa17\_\_177\_20\_68364; polytropa17\_\_232\_20\_66815;  
polytropa17\_\_34\_20\_67350; polytropa17\_\_235\_20\_66904; polytropa17\_\_16\_53254;  
polytropa17\_\_186\_20\_67049; polytropa17\_\_149\_20\_67166;  
polytropa17\_\_293\_20\_66752; polytropa17\_\_148\_20\_67165;  
polytropa17\_\_138\_20\_67153; polytropa17\_\_155\_20\_67340;  
polytropa17\_\_6\_20\_67463; polytropa17\_\_20\_67923\_163;  
polytropa17\_\_225\_20\_66832; polytropa17\_\_133\_20\_67110;  
polytropa17\_\_85\_20\_67226; polytropa17\_\_218\_20\_67945;  
polytropa17\_\_87\_20\_67214; polytropa17\_\_26\_20\_67431;  
polytropa17\_\_230\_20\_66806; polytropa18\_\_R77\_16\_53294

Species 64 (support = 0.996) = ASAP 'polytropa19'

---

polytropa19\_\_1\_106\_19\_65688

Species 65 (support = 0.823) = ASAP 'polytropa72'

---

polytropa\_FlakuS\_29565a; polytropa\_FlakuS\_29524

Species 66 (support = 0.961) = ASAP 'polytropa58'

---

polytropa58\_\_115\_LLJ20\_34

Species 67 (support = 0.156) = ASAP 'polytropa56'

---

polytropa56\_\_sl18454; polytropa56\_\_sl18454aGENOME; polytropa56\_\_sl18454a;  
polytropa56\_\_jh23011poly; polytropa56\_\_tm22538; polytropa56\_\_tm32231;  
polytropa56\_\_tm22537

Species 68 (support = 0.845) = ASAP 'subintricata2'

---

subintricata2\_\_MT939007

Species 69 (support = 0.845) = ASAP 'subintricata3'

---

subintricata3\_\_MT939008

Species 70 (support = 0.535) = ASAP 'polytropa34'

---

polytropa34\_\_tm21094; polytropa34\_\_tm8820; polytropa34\_\_tm2146;  
polytropa34\_\_tm13266

Species 71 (support = 0.339) = ASAP 'polytropa23', 'polytropa32' & 'polytropa33'

---

polytropa32a\_\_sl18457poly; polytropa32b\_\_sl21310; polytropa33\_\_L0115;  
polytropa33\_\_sl16615GENOME

Species 72 (support = 0.246) = ASAP 'polytropa36'

---

polytropa36\_\_sl18641fGENOME; polytropa36\_\_sl18653GENOME;  
polytropa36\_\_sl18653; polytropa36\_\_sl18641f; polytropa36\_\_sl18598GENOME;  
polytropa36\_\_sl18598poly; polytropa36\_\_sl18539a; polytropa36\_\_sl18539aGENOME

Species 73 (support = 0.972) = ASAP 'polytropa37'

---

polytropa37\_\_P238\_ZYY\_41

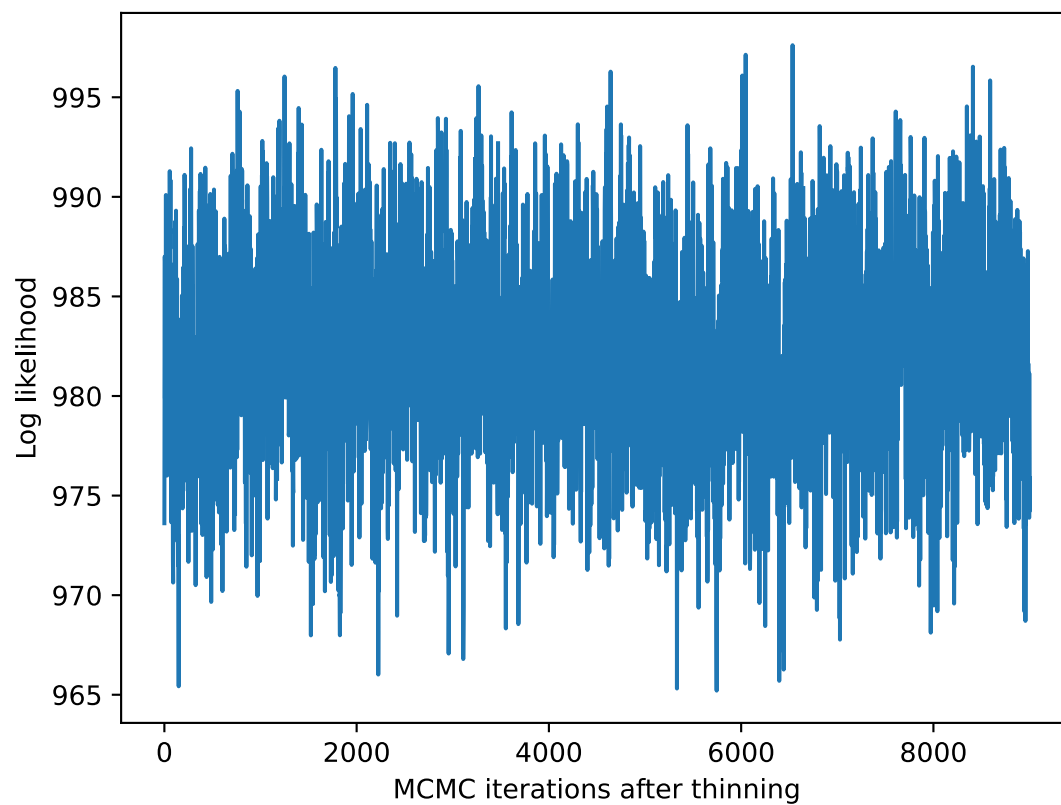

Supplement: s1 [file s1]
